# Supplementary material for: Effects of mild hypothermia on hemodynamics in cardiac arrest survivors and isolated failing human myocardium
Source: PubMed Central journal article supplement — Clin Res Cardiol. 2010 Feb 4;99(5):267–76. doi: 10.1007/s00392-010-0113-2 (PMC2858797; doi:10.1007/s00392-010-0113-2), 2010-02-04
Supplement: 392_2010_113_MOESM1_ESM.pdf [file 392_2010_113_MOESM1_ESM.pdf]

Figure 5

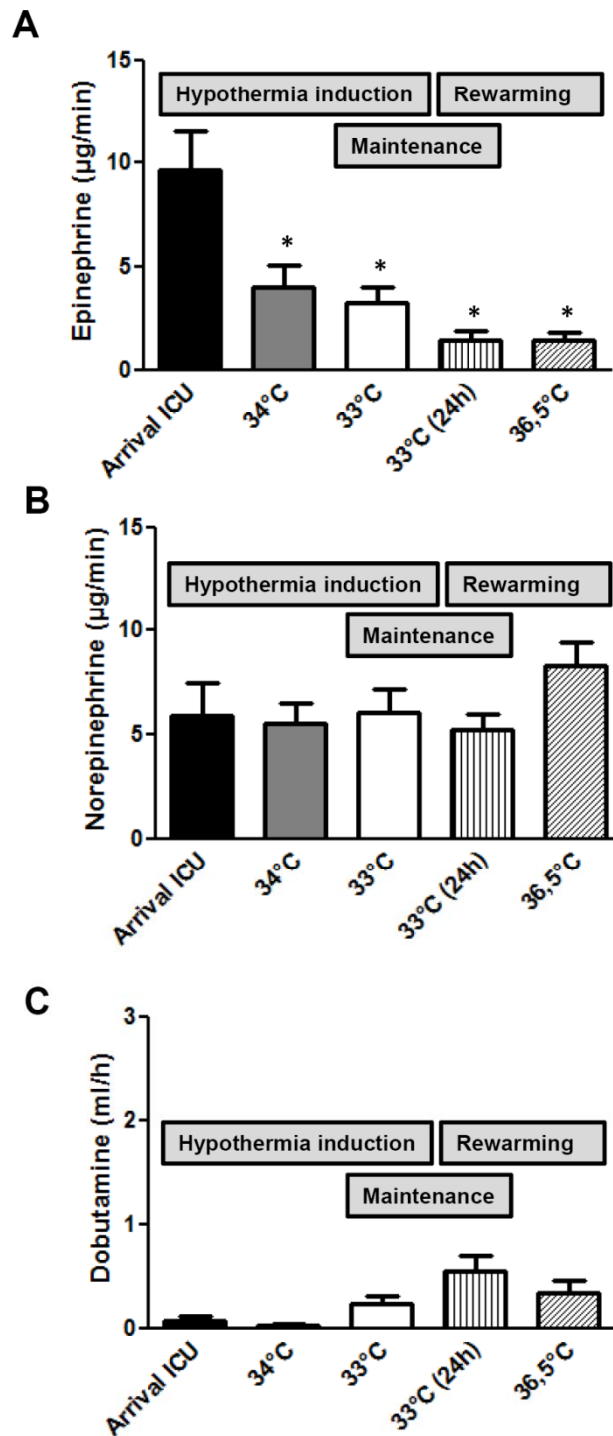

**Figure 5** Subgroup analysis of patients not treated with PCI. Hemodynamic support by catecholamines during induction of therapeutic hypothermia (on arrival at the intensive care unit (ICU), at 34°C and 33°C body temperature) and re-warming (after 24 h at 33°C and after reaching 36.5°C): **A** Infusion rate of epinephrine. \* =  $p < 0.05$  vs. arrival ICU. **B** Infusion rate of norepinephrine. Changes were not significant. **C** Infusion rate of dobutamine. Changes were not significant.

**Figure 6**

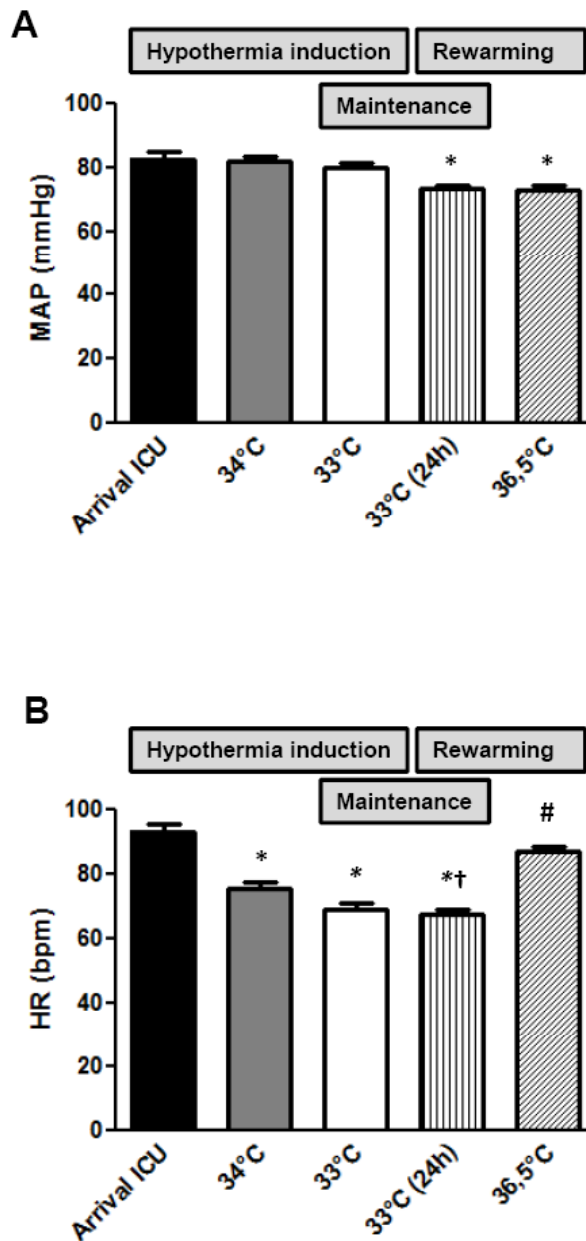

**Figure 6** Subgroup analysis of patients not treated with PCI. Hemodynamic parameters during induction of therapeutic hypothermia (on arrival at the intensive care unit (ICU), at 34°C and 33°C body temperature) and re-warming (after 24 h at 33°C and after reaching 36,5°C): **A** MAP: Mean arterial blood pressure. \* =  $p < 0.05$  vs. arrival ICU, 34°C and 33°C. **B** HR: Heart rate. \* =  $p < 0.05$  vs. arrival ICU, † =  $p < 0.05$  vs. 34°C, # =  $p < 0.05$  vs. 34°C, 33°C and 33°C (24h).

**Figure 7**

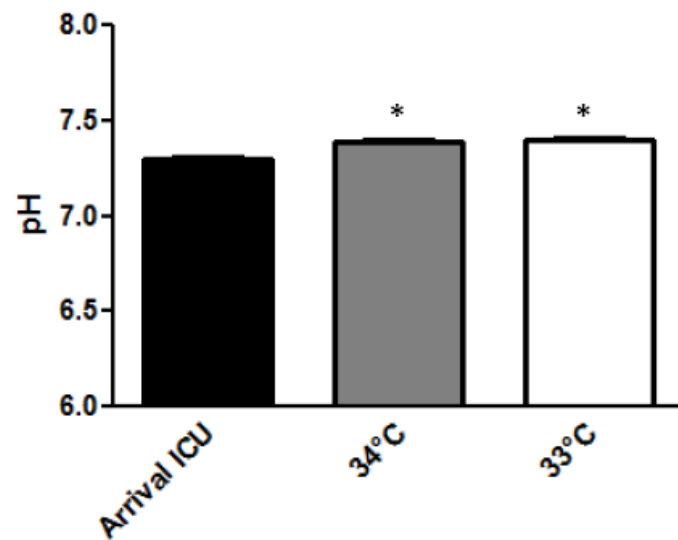

**Figure 7** Arterial pH during induction of hypothermia (on arrival at the intensive care unit (ICU), at 34°C and 33°C body temperature).

**Table 3. Clinical data of patients undergoing heart transplantation.**

| Patient  | Sex | Age (y)  | DCM / ICM | EF       | CI      | PCW      | Medications                  |
|----------|-----|----------|-----------|----------|---------|----------|------------------------------|
| ES       | F   | 45       | ICM       | ≤15      | NA      | NA       | DIU                          |
| YD       | M   | 62       | ICM       | 15       | 1,4     | 26       | ACEI, DIG, DIU, NIT          |
| HR       | M   | 66       | ICM       | 29       | 3       | 20       | ACEI, DIG, DIU, NIT          |
| DB       | M   | 62       | ICM       | 31       | 2,73    | 12       | AA, ACEI, DIG, DIU, CAT, NIT |
| FK       | M   | 67       | ICM       | 20       | 1,45    | 26       | ACEI, DIG, DIU, NIT, Spiro   |
| WS       | M   | 53       | DCM       | 15       | NA      | NA       | ACEI, BBL, DIG, DIU          |
| GN       | F   | 46       | DCM       | 21       | 1,7     | NA       | ACEI, BBL, DIG, DIU          |
| LW       | M   | 59       | DCM       | 33       | 1,67    | 19       | ACEI, BBL                    |
| RG       | F   | 42       | DCM       | 25       | 3,5     | NA       | ACEI, BBL, DIG, DIU          |
| BS       | M   | 39       | DCM       | 30       | 1,69    | 33       | NA                           |
| HP       | F   | 52       | DCM       | 10       | 2,23    | 28       | ACEI, BBL, DIU               |
| HM       | F   | 57       | DCM       | 25       | 2,18    | 30       | ACEI, DIG, DIU               |
| EL       | M   | 64       | ICM       | 31       | 1,2     | 30       | NA                           |
| WS       | M   | 64       | ICM       | 31       | 1,55    | 21       | AA, ACEI, DIG, DIU, CAT, NIT |
| HH       | M   | 51       | ICM       | 24       | 2,35    | 26       | ACEI, BBL, DIG, DIU          |
| Mean±SEM |     | 55.3±2.4 |           | 23.7±1.9 | 2.1±0.2 | 24.6±1.8 | Mittelwert±SEM               |

DCM: dilated cardiomyopathy; ICM: ischemic cardiomyopathy; EF: ejection fraction (%); CI: cardiac index (l/min/m<sup>2</sup>);  
 PCW: pulmonary capillary (mmHg); M: male; F: female; DIU: diuretics; ACEI: ACE inhibitor; DIG: digoxin/digitoxin; NIT: nitrates;  
 CAT: catecholamines; Spiro: spironolactone; BBL: β-blocker; NA: not available.
